## P1588

## micro rna expression profiling may predict cardiac remodeling after stemi

Ikonomidis I.<sup>1</sup>; Vlastos D.<sup>2</sup>; Katsanos S.<sup>2</sup>; Gazouli M.<sup>1</sup>; Thymis J.<sup>2</sup>; Triantafyllou C.<sup>3</sup>; Varoudi M.<sup>2</sup>; Andreadou I.<sup>1</sup>; Triantafyllidi H.<sup>2</sup>; Makavos G.<sup>2</sup>; Kapelouzou A.<sup>4</sup>; Vrettou AR.<sup>2</sup>; Frogoudaki A.<sup>2</sup>; Cokkinos D.<sup>4</sup>; Iliodromitis EK.<sup>1</sup>

<sup>1</sup>National & Kapodistrian University of Athens, Athens, Greece

<sup>2</sup>Attikon University Hospital, 2nd Cardiology Department, Athens, Greece

<sup>3</sup>Amalia Fleming Hospital, Athens, Greece

<sup>4</sup>Academy of Athens Biomedical Research Foundation, Athens, Greece

**Background:** MicroRNAs have been recognised as important modulators of cardiovascular function. However, their profiling in ischemic heart disease and contribution to cardiac remodeling has not been defined.

**Methods:** We examined 40 patients with STEMI and 20 healthy controls. MicroRNA expression profiling was carried out within 48 hours of the index ischemic event, measuring the expression of microRNA-144,-150,-499 (cardioprotective action), -21, and -208 (remodeling stimuli). In addition, every patient was evaluated by echocardiography, which was repeated after a 2-year follow-up period.

**Results:** Left-ventricular end-systolic volume (LVESV) and left-ventricular end-diastolic volume (LVEDV) decreased (from  $57.7 \pm 6.3$  to  $48.6 \pm 5.2$ ,  $p < 0.05$  and from  $102.1 \pm 7.1$  to  $85.9 \pm 5.7$ ,  $p < 0.05$ , respectively) while the ratio of early mitral inflow velocity to mitral annular early diastolic velocity ( $E/e'$ ) did not change (from  $9.32 \pm 0.6$  to  $9.56 \pm 0.8$ ,  $p = \text{NS}$ ). Mir-208 and -499 expression within 48 hours of STEMI ( $1.91 \pm 0.43/\text{U6sn}$  and  $1.7 \pm 0.48/\text{U6sn}$  respectively) were significantly positively correlated with a reduction in LVESV, LVEDV, and  $E/e'$ . In specific, mir-208 expression was associated with an absolute ( $r = -0.41$ ,  $p < 0.05$ ) and a percent reduction ( $r = -0.45$ ,  $p = 0.03$ ) in LVEDV and an absolute reduction in  $E/e'$  ( $r = 0.46$ ,  $p < 0.05$ ), while mir-499 was associated with an absolute ( $r = -0.4$ ,  $p < 0.05$ ) and percent reduction ( $p = -0.38$ ,  $p < 0.05$ ) in LVESV. Mir-499 median value ( $1.78[1.292.01]$ ) predicted reverse remodelling (LVESV reduction by  $>15\%$ ) with satisfactory specificity (0.82).

**Conclusion:** Mir- 208 and -499 expression may contribute to cardiac remodeling after STEMI, while mir-499 could be used as a prognostic marker of reverse remodeling.
